# Supplementary material
Source: Springer Nature journal article supplement (https://www.springermedizin.de/resource/supplementary/12955_2013_1139_MOESM1_ESM.pdf/9559374)
Supplement: MOESM1 [file 9559374]

# Conceptual framework of predictors of quality of life in users with severe mental disorders

Only variables that correlated with SQOL in bivariate analyses in each block were retained in the regression model to identify predictor of SQOL.

## Block 1: Socio-demographic variables at T0

Age  
Gender  
Civil status  
Education  
Employment  
Type of housing (autonomous/supervised)  
Nationality (Canadian/Others)  
Spoken language (French/Others)

## Block 2: Clinical variables at T0

Schizophrenia  
Mood disorders  
Anxiety disorders  
Personality disorders  
Delusion and other psychotic disorders  
Schizophrenia spectrum disorders  
Number of mental disorders  
Alcohol Use Disorders Identification Test (AUDIT) score

## Block 3: Needs and functionality variables at T0

Multnomah Community Ability Scale (MCAS) score  
Number of need areas

## Block 4: Negative Life Events at T0

History of violence  
History of legal problems

## Block 5: Social support at T0

Social Provision Scales scores (attachment, reassurance of worth, social integration, reliable alliance, guidance, nurturance)  
Frequency of contacts with family members and friends giving

## Block 6: Healthcare service use and appreciation at T0

Being on medication  
Visit to any healthcare professional or services  
Amount of help received from relatives  
Amount of help received from services  
ACSS score  
Adequacy of help received

**Subjective quality of life (SQOL)**  
(Satisfaction with Life Domains Scale - SLDS Score at T1)
